# Supplementary material
Source: publisher figshare collection journal article supplement (https://tandf.figshare.com/ndownloader/files/15584804)
Supplement: Supplementary file 1 [file 15584804]

**Online Appendix**

**Table A1.** Partisanship and opinions about Trump in the US electorate

|  |  |  |  |  |  |  |  |  |  |  |  |  |
| --- | --- | --- | --- | --- | --- | --- | --- | --- | --- | --- | --- | --- |
|  | **M1** |  |  | **M2** |  |  | **M3** |  |  | **M4** |  |  |
|  | Coef | Sig | Se | Coef | Sig | Se | Coef | Sig | Se | Coef | Sig | Se |
|  |  |  |  |  |  |  |  |  |  |  |  |  |
|  |  |  |  |  |  |  |  |  |  |  |  |  |
| Interest in politics | -0.21 |  | (0.37) | 1.88 | * | (0.95) | -16.48 | *** | (2.72) | 1.70 | † | (0.95) |
| Female | -3.45 | † | (1.90) | 1.09 |  | (1.39) | 1.29 |  | (1.36) | 1.35 |  | (1.38) |
| Age | 0.13 | † | (0.07) | 0.00 |  | (0.06) | -0.00 |  | (0.05) | 0.00 |  | (0.05) |
| Hispanic, Latinx | -7.60 |  | (4.72) | -5.20 |  | (3.57) | -5.20 |  | (3.51) | -5.19 |  | (3.56) |
| White, Caucasian | 4.10 |  | (4.54) | 0.84 |  | (3.45) | 1.42 |  | (3.39) | 0.65 |  | (3.44) |
| Black, African-American | -10.97 | * | (5.24) | -2.14 |  | (3.90) | -1.51 |  | (3.83) | -2.37 |  | (3.89) |
| Asian origin | 1.01 |  | (5.41) | 3.69 |  | (4.09) | 4.28 |  | (4.02) | 3.46 |  | (4.08) |
|  |  |  |  |  |  |  |  |  |  |  |  |  |
| Extraversion | 2.15 | *** | (0.57) | 1.41 | *** | (0.41) | 1.37 | *** | (0.40) | 0.82 |  | (1.22) |
| Agreeableness | -0.66 |  | (0.89) | 0.19 |  | (0.65) | 0.39 |  | (0.64) | 4.80 | * | (1.95) |
| Conscientiousness | 2.06 | * | (0.84) | -0.15 |  | (0.61) | -0.15 |  | (0.60) | -0.68 |  | (1.84) |
| Emotional stability | 1.78 | * | (0.69) | 0.75 |  | (0.51) | 0.64 |  | (0.50) | 0.75 |  | (1.44) |
| Openness | -4.89 | *** | (0.71) | -1.46 | ** | (0.52) | -1.53 | ** | (0.51) | -4.40 | ** | (1.58) |
|  |  |  |  |  |  |  |  |  |  |  |  |  |
| Narcissism | 2.67 | *** | (0.70) | 1.33 | ** | (0.51) | 1.31 | ** | (0.50) | 2.15 |  | (1.52) |
| Psychopathy | 0.22 |  | (0.99) | 0.35 |  | (0.73) | 0.58 |  | (0.71) | 8.42 | *** | (2.18) |
| Machiavellianism | -0.15 |  | (0.83) | -0.23 |  | (0.61) | -0.46 |  | (0.60) | -1.76 |  | (1.85) |
|  |  |  |  |  |  |  |  |  |  |  |  |  |
| Republican a |  |  |  | 54.19 | *** | (1.35) | 24.23 | *** | (4.37) | 71.05 | *** | (11.81) |
|  |  |  |  |  |  |  |  |  |  |  |  |  |
| Rep * Interest in politics |  |  |  |  |  |  | 13.25 | *** | (1.84) |  |  |  |
|  |  |  |  |  |  |  |  |  |  |  |  |  |
| Rep * Extraversion |  |  |  |  |  |  |  |  |  | 0.46 |  | (0.84) |
| Rep * Agreeableness |  |  |  |  |  |  |  |  |  | -3.25 | * | (1.32) |
| Rep * Conscientiousness |  |  |  |  |  |  |  |  |  | 0.25 |  | (1.29) |
| Rep * Emotional stability |  |  |  |  |  |  |  |  |  | 0.07 |  | (1.01) |
| Rep * Openness |  |  |  |  |  |  |  |  |  | 2.08 | * | (1.05) |
|  |  |  |  |  |  |  |  |  |  |  |  |  |
| Rep * Narcissism |  |  |  |  |  |  |  |  |  | -0.49 |  | (1.04) |
| Rep * Psychopathy |  |  |  |  |  |  |  |  |  | -5.75 | *** | (1.48) |
| Rep * Machiavellianism |  |  |  |  |  |  |  |  |  | 1.05 |  | (1.24) |
|  |  |  |  |  |  |  |  |  |  |  |  |  |
| Constant | 20.23 | * | (9.94) | -57.41 | *** | (7.75) | -16.39 | † | (9.51) | -80.85 | *** | (17.81) |
|  |  |  |  |  |  |  |  |  |  |  |  |  |
|  |  |  |  |  |  |  |  |  |  |  |  |  |
| N | 1,544 |  |  | 1,346 |  |  | 1,346 |  |  | 1,346 |  |  |
| R2 | 0.09 |  |  | 0.60 |  |  | 0.61 |  |  | 0.60 |  |  |
|  |  |  |  |  |  |  |  |  |  |  |  |  |

Dataset A (US citizens, MTurk 1). The dependent variable measures the respondents’ opinion about Trump (“feeling thermometer”) and varies between 0 “no warm feelings at all” and 100 “very warm feelings”.

a Party identification. Reference category is “Democrats”; independents, third-party and voters with no preference excluded.

*** p<0.001, ** p<0.01, * p<0.05, † p<0.1

**Table A2.** Partisanship and opinions about the Republican Party in the US electorate

|  |  |  |  |  |  |  |  |  |  |  |  |  |
| --- | --- | --- | --- | --- | --- | --- | --- | --- | --- | --- | --- | --- |
|  | **M1** |  |  | **M2** |  |  | **M3** |  |  | **M4** |  |  |
|  | Coef | Sig | Se | Coef | Sig | Se | Coef | Sig | Se | Coef | Sig | Se |
|  |  |  |  |  |  |  |  |  |  |  |  |  |
|  |  |  |  |  |  |  |  |  |  |  |  |  |
| Interest in politics | -0.55 | † | (0.32) | -2.27 | ** | (0.86) | -13.41 | *** | (2.47) | -2.24 | ** | (0.86) |
| Female | 0.85 |  | (1.65) | 3.58 | ** | (1.25) | 3.71 | ** | (1.24) | 3.71 | ** | (1.25) |
| Age | -0.01 |  | (0.07) | -0.08 | † | (0.05) | -0.08 | † | (0.05) | -0.09 | † | (0.05) |
| Hispanic, Latinx | -4.29 |  | (4.11) | -1.25 |  | (3.22) | -1.24 |  | (3.19) | -1.42 |  | (3.22) |
| White, Caucasian | 4.99 |  | (3.95) | 2.42 |  | (3.11) | 2.77 |  | (3.08) | 2.29 |  | (3.11) |
| Black, African-American | -8.83 | † | (4.56) | -1.71 |  | (3.51) | -1.32 |  | (3.49) | -2.03 |  | (3.52) |
| Asian origin | 3.36 |  | (4.71) | 4.53 |  | (3.69) | 4.89 |  | (3.66) | 4.60 |  | (3.69) |
|  |  |  |  |  |  |  |  |  |  |  |  |  |
| Extraversion | 1.95 | *** | (0.49) | 1.39 | *** | (0.37) | 1.36 | *** | (0.37) | 0.37 |  | (1.10) |
| Agreeableness | 0.16 |  | (0.77) | 1.01 | † | (0.59) | 1.13 | † | (0.58) | 1.50 |  | (1.76) |
| Conscientiousness | 1.82 | * | (0.73) | 0.04 |  | (0.55) | 0.03 |  | (0.55) | -0.50 |  | (1.66) |
| Emotional stability | 1.26 | * | (0.60) | 0.34 |  | (0.46) | 0.27 |  | (0.45) | 3.31 | * | (1.30) |
| Openness | -4.94 | *** | (0.61) | -1.86 | *** | (0.47) | -1.91 | *** | (0.47) | -2.21 |  | (1.43) |
|  |  |  |  |  |  |  |  |  |  |  |  |  |
| Narcissism | 3.25 | *** | (0.61) | 2.31 | *** | (0.46) | 2.30 | *** | (0.46) | 2.61 | † | (1.38) |
| Psychopathy | -1.09 |  | (0.86) | -0.50 |  | (0.65) | -0.35 |  | (0.65) | 3.70 | † | (1.97) |
| Machiavellianism | 0.05 |  | (0.72) | -0.62 |  | (0.55) | -0.76 |  | (0.55) | -2.27 |  | (1.67) |
|  |  |  |  |  |  |  |  |  |  |  |  |  |
| Republican a |  |  |  | 46.09 | *** | (1.21) | 27.90 | *** | (3.97) | 57.58 | *** | (10.65) |
|  |  |  |  |  |  |  |  |  |  |  |  |  |
| Rep * Interest in politics |  |  |  |  |  |  | 8.05 | *** | (1.68) |  |  |  |
|  |  |  |  |  |  |  |  |  |  |  |  |  |
| Rep * Extraversion |  |  |  |  |  |  |  |  |  | 0.73 |  | (0.76) |
| Rep * Agreeableness |  |  |  |  |  |  |  |  |  | -0.32 |  | (1.19) |
| Rep * Conscientiousness |  |  |  |  |  |  |  |  |  | 0.39 |  | (1.16) |
| Rep * Emotional stability |  |  |  |  |  |  |  |  |  | -2.18 | * | (0.91) |
| Rep * Openness |  |  |  |  |  |  |  |  |  | 0.29 |  | (0.95) |
|  |  |  |  |  |  |  |  |  |  |  |  |  |
| Rep * Narcissism |  |  |  |  |  |  |  |  |  | -0.22 |  | (0.94) |
| Rep * Psychopathy |  |  |  |  |  |  |  |  |  | -2.95 | * | (1.34) |
| Rep * Machiavellianism |  |  |  |  |  |  |  |  |  | 1.20 |  | (1.12) |
|  |  |  |  |  |  |  |  |  |  |  |  |  |
| Constant | 24.85 | ** | (8.65) | -34.66 | *** | (6.98) | -9.76 |  | (8.65) | -50.93 | ** | (16.09) |
|  |  |  |  |  |  |  |  |  |  |  |  |  |
|  |  |  |  |  |  |  |  |  |  |  |  |  |
| N | 1,546 |  |  | 1,348 |  |  | 1,348 |  |  | 1,348 |  |  |
| R2 | 0.10 |  |  | 0.58 |  |  | 0.58 |  |  | 0.58 |  |  |
|  |  |  |  |  |  |  |  |  |  |  |  |  |

Dataset A (US citizens, MTurk 1). The dependent variable measures the respondents’ opinion about the Republican Party (“feeling thermometer”) and varies between 0 “no warm feelings at all” and 100 “very warm feelings”.

a Party identification. Reference category is “Democrats”; independents, third-party and voters with no preference excluded.

*** p<0.001, ** p<0.01, * p<0.05, † p<0.1

**Table A3**. Trump’s perceived Big Five traits by expert profile

|  |  | |  |  |  |  |  |  |  |  |  |  |  |  | | |  |  |
| --- | --- | --- | --- | --- | --- | --- | --- | --- | --- | --- | --- | --- | --- | --- | --- | --- | --- | --- |
|  | **Extraversion** | | | | **Agreeableness** | | | **Conscientiousness** | | | **Emotional stability** | | | | **Openness** | | | |
|  |  |  | |  |  |  |  |  |  |  |  |  |  |  | |  | |  |
|  |  |  | |  |  |  |  |  |  |  |  |  |  |  | |  | |  |
|  | Coef | Sig | | Se | Coef | Sig | Se | Coef | Sig | Se | Coef | Sig | Se | Coef | | Sig | | Se |
|  |  |  | |  |  |  |  |  |  |  |  |  |  |  | |  | |  |
|  |  |  | |  |  |  |  |  |  |  |  |  |  |  | |  | |  |
| Expert left-right | -0.02 |  | | (0.05) | 0.07 | † | (0.04) | -0.00 |  | (0.07) | 0.14 | * | (0.05) | 0.11 | |  | | (0.07) |
| Familiarity w/ elect | 0.06 |  | | (0.04) | -0.01 |  | (0.03) | -0.02 |  | (0.06) | 0.03 |  | (0.05) | 0.01 | |  | | (0.06) |
| Survey was easy | -0.03 |  | | (0.03) | -0.02 |  | (0.02) | 0.01 |  | (0.04) | -0.03 |  | (0.04) | -0.06 | |  | | (0.05) |
| Female expert | 0.10 |  | | (0.17) | 0.11 |  | (0.12) | 0.53 | * | (0.22) | 0.09 |  | (0.18) | 0.19 | |  | | (0.23) |
| Age | -0.01 |  | | (0.01) | 0.00 |  | (0.00) | -0.00 |  | (0.01) | 0.01 | * | (0.01) | 0.02 | | * | | (0.01) |
| Works in Red State | 0.09 |  | | (0.15) | -0.01 |  | (0.11) | 0.34 | † | (0.20) | 0.19 |  | (0.16) | 0.01 | |  | | (0.20) |
| Disc: Elections | -0.15 |  | | (0.17) | 0.11 |  | (0.12) | 0.06 |  | (0.23) | -0.23 |  | (0.18) | 0.45 | | † | | (0.23) |
| Disc: Pol. Psych. | -0.17 |  | | (0.19) | 0.21 |  | (0.13) | -0.46 | † | (0.25) | -0.02 |  | (0.20) | -0.05 | |  | | (0.25) |
| Disc: US politics | -0.06 |  | | (0.18) | -0.09 |  | (0.13) | -0.07 |  | (0.24) | -0.06 |  | (0.20) | -0.23 | |  | | (0.25) |
| Disc: Pol. Comm. | -0.13 |  | | (0.15) | -0.08 |  | (0.11) | 0.02 |  | (0.21) | 0.20 |  | (0.17) | -0.34 | |  | | (0.21) |
| Disc: Methods | -0.09 |  | | (0.16) | 0.06 |  | (0.11) | 0.39 | † | (0.21) | -0.14 |  | (0.17) | 0.25 | |  | | (0.21) |
|  |  |  | |  |  |  |  |  |  |  |  |  |  |  | |  | |  |
| Intercept | 6.78 | *** | | (0.46) | 1.23 | *** | (0.33) | 1.94 | ** | (0.62) | 0.50 |  | (0.50) | 2.25 | | *** | | (0.63) |
|  |  |  | |  |  |  |  |  |  |  |  |  |  |  | |  | |  |
|  |  |  | |  |  |  |  |  |  |  |  |  |  |  | |  | |  |
| N(experts) | 177 |  | |  | 178 |  |  | 175 |  |  | 175 |  |  | 173 | |  | |  |
| R2 | 0.05 |  | |  | 0.07 |  |  | 0.08 |  |  | 0.09 |  |  | 0.12 | |  | |  |
|  |  |  | |  |  |  |  |  |  |  |  |  |  |  | |  | |  |

Dataset C (Experts, US Midterms). Personality traits vary between 1 “very low” and 7 “very high”.

*** p<0.001, ** p<0.01, * p<0.05, † p<0.1

**Table A4**. Trump’s perceived Dark Triad traits by expert profile

|  |  |  |  |  |  |  |  |  |  |
| --- | --- | --- | --- | --- | --- | --- | --- | --- | --- |
|  | **Narcissism** | | | **Psychopathy** | | | **Machiavellianism** | | |
|  |  |  |  |  |  |  |  |  |  |
|  |  |  |  |  |  |  |  |  |  |
|  | Coef | Sig | Se | Coef | Sig | Se | Coef | Sig | Se |
|  |  |  |  |  |  |  |  |  |  |
|  |  |  |  |  |  |  |  |  |  |
| Expert left-right | -0.05 | ** | (0.02) | -0.04 |  | (0.03) | -0.05 | † | (0.03) |
| Familiarity w/ elect | 0.01 |  | (0.01) | 0.01 |  | (0.03) | 0.02 |  | (0.03) |
| Survey was easy | 0.00 |  | (0.01) | 0.01 |  | (0.02) | -0.01 |  | (0.02) |
| Female expert | 0.08 |  | (0.06) | -0.17 |  | (0.11) | 0.04 |  | (0.11) |
| Age | 0.00 |  | (0.00) | 0.00 |  | (0.00) | 0.00 |  | (0.00) |
| Works in Red State | -0.04 |  | (0.05) | -0.08 |  | (0.10) | -0.02 |  | (0.09) |
| Disc: Elections | 0.01 |  | (0.06) | -0.01 |  | (0.11) | -0.03 |  | (0.11) |
| Disc: Pol. Psych. | 0.06 |  | (0.07) | -0.06 |  | (0.12) | 0.01 |  | (0.12) |
| Disc: US politics | 0.02 |  | (0.06) | -0.05 |  | (0.12) | -0.18 |  | (0.12) |
| Disc: Pol. Comm. | -0.02 |  | (0.05) | -0.09 |  | (0.10) | 0.00 |  | (0.10) |
| Disc: Methods | 0.01 |  | (0.06) | -0.18 | † | (0.10) | -0.02 |  | (0.10) |
|  |  |  |  |  |  |  |  |  |  |
| Intercept | 6.74 | *** | (0.16) | 6.72 | *** | (0.30) | 6.68 | *** | (0.29) |
|  |  |  |  |  |  |  |  |  |  |
|  |  |  |  |  |  |  |  |  |  |
| N(experts) | 179 |  |  | 177 |  |  | 176 |  |  |
| R2 | 0.09 |  |  | 0.09 |  |  | 0.05 |  |  |
|  |  |  |  |  |  |  |  |  |  |

Dataset C (Experts, US Midterms). Personality traits vary between 1 “very low” and 7 “very high”.

*** p<0.001, ** p<0.01, * p<0.05, † p<0.1

**Table A5.** Perceived personality traits of Rutte, Wilders and Merkel by experts and Dutch students

|  |  |  |  |  |  |  |  |  |  |  |  |
| --- | --- | --- | --- | --- | --- | --- | --- | --- | --- | --- | --- |
|  | Geert Wilders | | |  | Mark Rutte | | |  | Angela Merkel | | |
|  |  |  |  |  |  |  |  |  |  |  |  |
|  |  |  |  |  |  |  |  |  |  |  |  |
|  | Mean | SD | N |  | Mean | SD | N |  | Mean | SD | N |
|  |  |  |  |  |  |  |  |  |  |  |  |
|  |  |  |  |  |  |  |  |  |  |  |  |
| Experts |  |  |  |  |  |  |  |  |  |  |  |
| Big Five |  |  |  |  |  |  |  |  |  |  |  |
| Openness | 1.50 | 1.21 | 10 |  | 2.33 | 1.08 | 6 |  | 1.71 | 0.95 | 10 |
| Conscientiousness | 2.73 | 0.98 | 10 |  | 3.04 | 0.77 | 6 |  | 3.79 | 0.48 | 10 |
| Extraversion | 2.50 | 1.12 | 10 |  | 3.19 | 0.64 | 6 |  | 0.61 | 0.65 | 10 |
| Agreeableness | 0.41 | 0.66 | 10 |  | 2.63 | 0.83 | 6 |  | 2.35 | 1.22 | 10 |
| Emotional stability | 1.63 | 1.29 | 10 |  | 3.06 | 0.49 | 6 |  | 3.71 | 0.45 | 10 |
| Dark Triad |  |  |  |  |  |  |  |  |  |  |  |
| Narcissism | 3.11 | 0.87 | 13 |  | 2.67 | 1.53 | 3 |  | 1.81 | 1.17 | 12 |
| Psychopathy | 3.58 | 0.85 | 13 |  | 2.00 | 0.58 | 3 |  | 1.85 | 0.97 | 12 |
| Machiavellianism | 1.86 | 0.75 | 13 |  | 2.83 | 0.79 | 3 |  | 1.59 | 0.92 | 12 |
|  |  |  |  |  |  |  |  |  |  |  |  |
| Dutch Students: Left |  |  |  |  |  |  |  |  |  |  |  |
| Big Five |  |  |  |  |  |  |  |  |  |  |  |
| Openness | 1.38 | 0.91 | 40 |  | 1.88 | 0.81 | 39 |  | 2.15 | 0.85 | 42 |
| Conscientiousness | 1.90 | 1.00 | 40 |  | 3.09 | 0.67 | 43 |  | 3.41 | 0.62 | 46 |  |  |
| Extraversion | 2.79 | 0.82 | 45 |  | 2.37 | 0.80 | 43 |  | 1.58 | 0.94 | 46 |
| Agreeableness | 0.79 | 0.78 | 45 |  | 1.89 | 0.67 | 41 |  | 1.72 | 0.76 | 46 |
| Emotional stability | 1.16 | 1.03 | 40 |  | 2.83 | 0.76 | 41 |  | 3.09 | 0.78 | 45 |
| Dark Triad |  |  |  |  |  |  |  |  |  |  |  |
| Narcissism | 3.07 | 0.89 | 43 |  | 2.46 | 0.83 | 45 |  | 1.80 | 1.06 | 47 |
| Psychopathy | 3.36 | 0.82 | 40 |  | 1.63 | 0.77 | 42 |  | 1.36 | 1.00 | 44 |
| Machiavellianism | 2.83 | 0.97 | 36 |  | 2.05 | 0.74 | 38 |  | 1.46 | 1.03 | 42 |
|  |  |  |  |  |  |  |  |  |  |  |  |
| Dutch Students: Center |  |  |  |  |  |  |  |  |  |  |  |
| Big Five |  |  |  |  |  |  |  |  |  |  |  |
| Openness | 1.72 | 0.81 | 23 |  | 2.07 | 0.73 | 23 |  | 1.84 | 0.90 | 29 |
| Conscientiousness | 2.13 | 0.84 | 24 |  | 2.90 | 0.76 | 26 |  | 3.32 | 0.62 | 30 |
| Extraversion | 2.80 | 0.87 | 25 |  | 2.30 | 0.78 | 25 |  | 1.66 | 0.82 | 31 |
| Agreeableness | 1.10 | 0.68 | 25 |  | 2.00 | 0.63 | 25 |  | 1.47 | 0.60 | 30 |
| Emotional stability | 1.30 | 0.90 | 25 |  | 2.90 | 0.78 | 25 |  | 3.02 | 0.74 | 29 |
| Dark Triad |  |  |  |  |  |  |  |  |  |  |  |
| Narcissism | 3.29 | 0.72 | 24 |  | 2.46 | 0.79 | 26 |  | 1.90 | 0.87 | 30 |
| Psychopathy | 3.04 | 0.82 | 23 |  | 1.63 | 0.50 | 23 |  | 1.73 | 0.80 | 28 |
| Machiavellianism | 2.96 | 0.69 | 24 |  | 1.94 | 0.74 | 24 |  | 1.52 | 0.89 | 29 |
|  |  |  |  |  |  |  |  |  |  |  |  |
| Dutch Students: Right |  |  |  |  |  |  |  |  |  |  |  |
| Big Five |  |  |  |  |  |  |  |  |  |  |  |
| Openness | 1.76 | 0.88 | 36 |  | 2.33 | 0.75 | 36 |  | 2.06 | 0.72 | 35 |
| Conscientiousness | 2.18 | 0.92 | 36 |  | 2.99 | 0.61 | 37 |  | 3.18 | 0.77 | 37 |
| Extraversion | 2.97 | 0.81 | 36 |  | 2.42 | 0.73 | 37 |  | 1.60 | 0.66 | 35 |
| Agreeableness | 0.96 | 0.78 | 36 |  | 2.13 | 0.67 | 38 |  | 1.83 | 0.86 | 36 |
| Emotional stability | 1.61 | 1.01 | 36 |  | 2.78 | 0.65 | 37 |  | 2.99 | 0.78 | 35 |
| Dark Triad |  |  |  |  |  |  |  |  |  |  |  |
| Narcissism | 3.17 | 0.79 | 38 |  | 2.51 | 0.73 | 37 |  | 2.21 | 0.98 | 34 |
| Psychopathy | 2.86 | 0.98 | 36 |  | 1.54 | 0.75 | 37 |  | 1.60 | 0.89 | 34 |
| Machiavellianism | 2.63 | 0.84 | 38 |  | 2.03 | 0.84 | 36 |  | 1.69 | 0.83 | 36 |
|  |  |  |  |  |  |  |  |  |  |  |  |

Scores are from Dataset D (Experts, Netherlands election 2017), Dataset D (Experts, Germany election 2017), and Dataset G (Dutch students, sample 2). Ideological leaning based on self-reported score on the left-right scale: 0-3 ‘left’, 4-5 ‘center’, 6-10 ‘right’. Personality evaluations range from 0 ‘very low’ to 4 ‘very high’.

**Figure A1.** Trump Big Five and Dark Triad personality traits; comparing experts and Dutch student evaluations (by ideology)


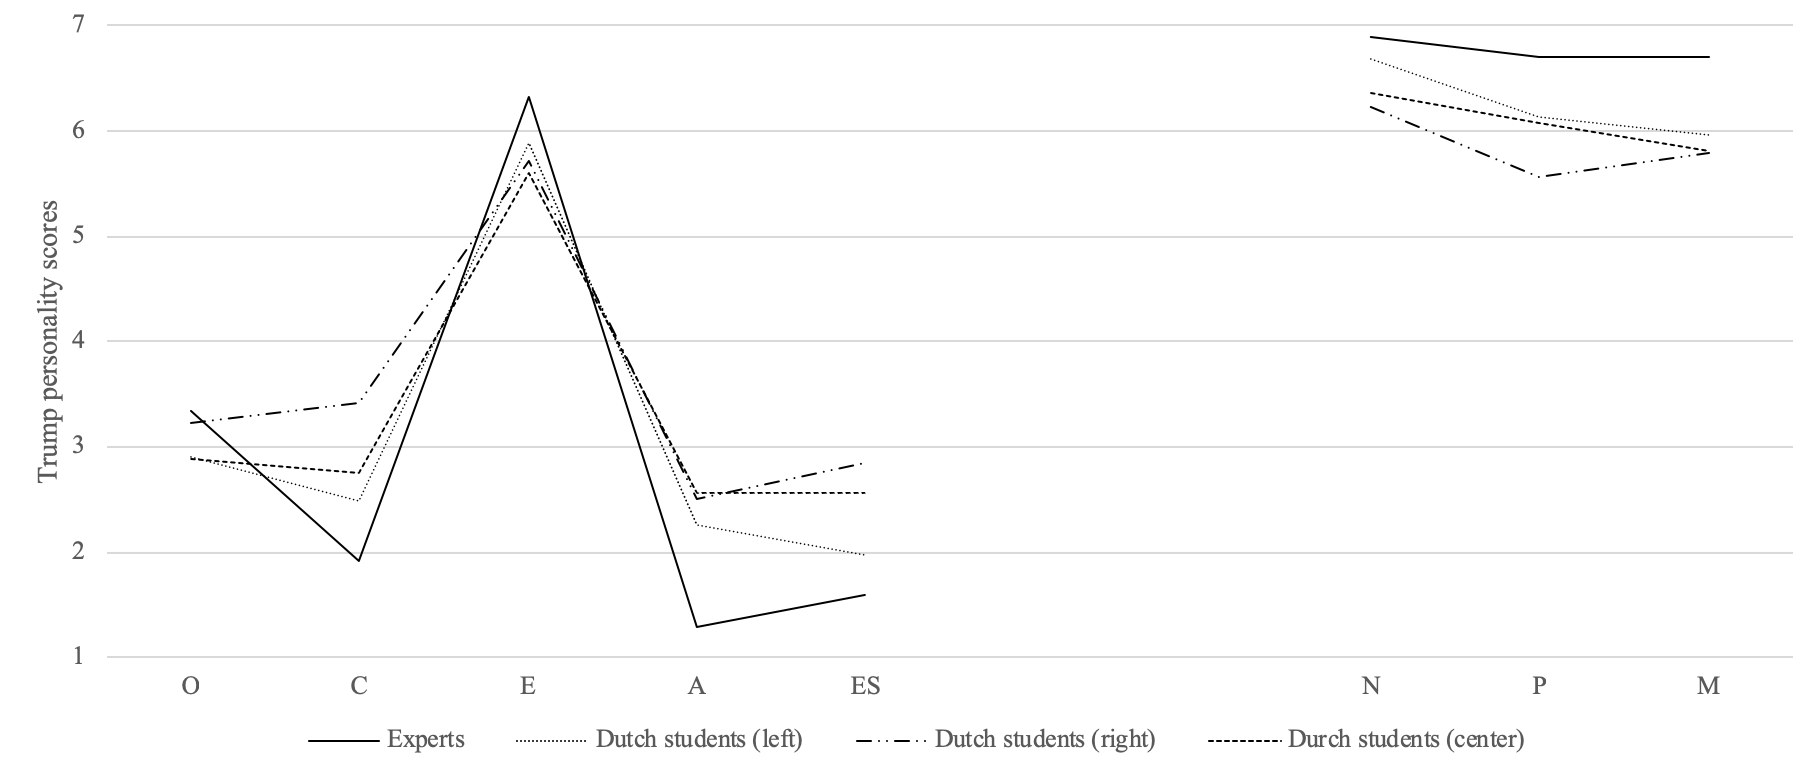


Comparison of scores from Dataset C (Experts, US Midterms), and Dataset F (Dutch students, sample 1) Ideological leaning based on self-reported score on the left-right scale: 0-3 ‘left’, 4-5 ‘center’, 6-10 ‘right’.
